# Supplementary material
Source: publisher figshare collection journal article supplement (https://gsajournals.figshare.com/ndownloader/files/18009620)
Supplement: Supplementary file 1 [file 18009620]

## Sheet: Sheet1
Table S8. The summary of the QTL detected for reproductive maturity in Syn10 DH x Oy1-N1989/+:B73 F1 test cross populations.
							LOD-2 Intervale			Mean±SEg
Trait Identifier	QTLa	Chrb	LODc	Positiond	Left Marker	Right Marker	Left	Right	PVEf	B73	Mo17	Greater Allele
MT_DTA	2	2	4.4	619.7	chr02.970	chr02.1038	613.6	757	7.7	62.27±0.33	64.82±0.45	Mo17
		10	65.7	192	chr10.94.5	chr10.95.5	188.7	193	66.09	60.8±0.18	68.73±0.29	Mo17
MT_DTS	2	2	4.2	619.7	chr02.970	chr02.1038	613.6	755.8	7.36	63.52±0.34	66.07±0.46	Mo17
		10	64.4	192	chr10.94.5	chr10.95.5	188.7	193	66.1	61.95±0.19	70.1±0.29	Mo17
Ratio_DTA	1	10	71.4	192	chr10.94.5	chr10.95.5	190.5	193	67.56	1.08±0.003	1.22±0.004	Mo17
Ratio_DTS	1	10	66.7	192	chr10.94.5	chr10.95.5	190.5	193	65.95	1.07±0.003	1.21±0.005	Mo17
Diff_DTA	1	10	73.3	192	chr10.94.5	chr10.95.5	190.5	193	68.12	-4.75±0.18	-12.69±0.27	B73
Diff_DTS	1	10	69.1	192	chr10.94.5	chr10.95.5	190.5	193	66.88	-4.48±0.19	-12.56±0.29	B73
aNumber of QTL detected for a given trait
bChromosome location of a QTL
cLOD score at the peak of a given QTL
dPeak position and eLOD-2 interval of the QTL in terms of genetic position in centiMorgan(cM)
fPVE is percent of variance explained by the QTL at this position as estimated by regression and reported as an R2 value*100
gMean and standard error of the trait with B73 and Mo17 genotype at the peak marker of the detected QTL
